1 **Trends in the 30-year span of Noninfectious Cardiovascular Implantable Electronic Device**  
2 **Complications in Olmsted County**

3 Gurukripa N. Kowlgi, MBBS<sup>1</sup>; Vaibhav Vaidya, MBBS<sup>1</sup>; Ming-Yan Dai<sup>1</sup>; Rahul Mishra<sup>1</sup>; David  
4 O. Hodge<sup>3</sup>; Abhishek J. Deshmukh, MBBS<sup>1</sup>; Siva K. Mulpuru, MD, MPH; Paul A. Friedman,  
5 MD; Yong- Mei Cha, MD<sup>1</sup>

6 1. Department of Cardiovascular Medicine, Mayo Clinic, Rochester, MN 55905, USA

7 2. Department of Quantitative Health Sciences, Jacksonville, FL 32224, USA

8

9 **Word count: 4902 words**

10

11 **Corresponding author:**

12 Yong-Mei Cha, MD, FHRS

13 Professor of Medicine

14 Mayo Clinic, 200 First St SW

15 Rochester, MN 55905, USA

16 E-mail: [ycha@mayo.edu](mailto:ycha@mayo.edu);

17 Phone: 5072843585; Fax: 5072552550

18

19

20 **Abstract:**

21 **Background:** Cardiovascular implantable electronic devices (CIEDs) such as permanent  
22 pacemakers, implantable cardioverter-defibrillators, and cardiac resynchronization therapy  
23 devices alleviate morbidity and mortality in various diseases. There is a paucity of real-world  
24 data on CIED complications and trends.

25 **Objectives:** Describe trends in noninfectious CIED complications over the past three decades in  
26 Olmsted County.

27 **Methods:** The Rochester Epidemiology Project is a medical records linkage system comprising  
28 records of over 500,000 residents of Olmsted County from 1966-current. CIED implants between  
29 1988-2018 were determined. Trends in noninfectious complications within 30 days of implant  
30 were analyzed.

31 **Results:** 175 out of 2536 (6.9%) patients who received CIED experienced device complications.  
32 3.8% of the implants had major complications requiring intervention. Lead dislodgement was the  
33 most common (2.9%), followed by hematoma (2.1%). Complications went up from 1988 to  
34 2005, then showed a downtrend until 2018, driven by a decline in hematomas in the last decade  
35 ( $p < 0.01$ ). Those with complications were more likely to have prosthetic valves. Obesity appeared  
36 to have a protective effect in a multivariate regression model. The mean Charlson comorbidity  
37 score has trended up over the 30 years.

38 **Conclusions:** Our study describes a real-world trend of CIED complications over three decades.  
39 Lead dislodgements and hematomas were the most common complications. Complications have  
40 declined over the last decade due to safer practices and a better understanding of anticoagulant  
41 management.

42 **Key Words:** Cardiovascular implantable electronic devices, pacemaker, implantable  
43 cardioverter-defibrillator, cardiac resynchronization therapy, complications.

44

45 **Abbreviations:**

46 CIED: Cardiac Implantable Electronic Devices

47 ICD: Implantable Cardioverter-Defibrillator

48 PPM: Permanent Pacemaker

49 CRT: Cardiac Resynchronization Therapy

50 CRT-P: Cardiac Resynchronization Therapy - Pacemaker

51 CRT-D: Cardiac Resynchronization Therapy - Defibrillator

52 FDA: Food and Drug Administration

53 REP: Rochester Epidemiology Project

54 ICD-9/10: International Classification of Diseases 9<sup>th</sup> /10<sup>th</sup> Revision

55 CPT: Current Procedural Terminology

56 NIS: National Inpatient Sample

57 NCDR: National Cardiovascular Data Registry

58

## 59 **Introduction:**

60 Cardiac implantable electronic devices (CIEDs) such as the permanent pacemaker (PPM),  
61 implantable cardioverter-defibrillator (ICD), and cardiac resynchronization therapy (CRT)  
62 systems are ubiquitously employed for managing a variety of cardiac arrhythmia and  
63 comorbidities. In recent years, we have witnessed an expansion in the indications for CIED  
64 implantation<sup>1-4</sup>. CIEDs have augmented patient quality of life, reduced hospitalization length,  
65 and reduced mortality<sup>5-7</sup>.

66 Notwithstanding substantial technological improvements, complications involving CIED  
67 implants remain a significant issue<sup>8-10</sup>. Acute complications of CIED implants include lead  
68 dislodgement, perforation, pneumothorax, pocket hematoma, infection, and upper extremity deep  
69 vein thrombosis (DVT)<sup>8-11</sup>. With an increase in life expectancy and expanding CIED implant  
70 indications, implant-related adverse events are anticipated<sup>12-14</sup>. Device complications are critical  
71 to detect and manage to improve patient safety, prevent reoperations, reduce the length of  
72 hospital stay, and mitigate downstream healthcare costs<sup>15,16</sup>.

73 The majority of what we know about CIED complications is curated from secondary  
74 analysis of randomized trials<sup>10,17</sup>, registry-based studies<sup>18,19</sup>, or hospital-based databases<sup>15,20</sup>.  
75 Administrative-claims-based databases have been shown to have low specificity in determining  
76 true CIED complications<sup>21</sup>. There exists a paucity of real-life population-based data on the  
77 incidence, trends, and predictors of CIED complications. There exists a paucity of real-life  
78 population-based data on the incidence, trends, and predictors of CIED complications. Our group  
79 has previously published data on the trends of CIED infections<sup>14</sup>. In the present study, we

80 present retrospective population-based data on the noninfectious mechanical CIED  
81 complications between 1988 and 2018.

## 82 **Methods:**

### 83 *Data source*

84 Our study was approved by the Mayo Clinic Institutional Review Board and received proper  
85 ethical oversight. Data were obtained from the Rochester Epidemiology Project (REP). The REP  
86 is a medical records linkage system containing medical records of all residents of Olmsted  
87 County, MN, from January 1, 1966, to the present, consisting of follow-up data on more than  
88 500,000 unique individuals. Patient demographics, diagnostic codes such as the international  
89 classification of diseases 9<sup>th</sup> and 10<sup>th</sup> revision (ICD-9/10-CM) codes, and surgical procedure  
90 codes are recorded for all individuals. Paper and electronic medical records of these individuals  
91 are available for the generation of additional data. The REP permits the collection of population-  
92 based data and has been used to define the incidence of various medical conditions. It consists of  
93 two major hospital systems in Olmsted County (Mayo Clinic and Olmsted Medical Center) and  
94 smaller practices.

### 95 *Study population*

96 The REP database was used to determine all patients who received CIED implantation between  
97 1988 and 2018. During the study period, Mayo Clinic and Olmsted Medical Center were the only  
98 two institutions in Olmsted County performing CIED implantation and follow-up. There were  
99 four device implanters in the early 1990s and ten in 2018. Patients receiving CIEDs were  
100 determined based on ICD-9 CM and ICD-10 PCS codes. Data on subsequent device upgrades  
101 from PPM to ICD or CRT or ICD to CRT were collected using ICD-9 and 10 codes and

102 manually verified. For this study, we only included procedures that involved intracardiac lead  
103 implantation. Thus, subcutaneous ICDs, generator change, and device extraction without lead  
104 implantation/revision were excluded. Data regarding baseline demographics and comorbidities  
105 were obtained from the REP and abstracted from the medical records. The patients' charts with  
106 device complications were manually reviewed to confirm the complications. The Charlson  
107 comorbidity index is a score derived from multiple risk factors that predict 1-year survival and  
108 can be used as a surrogate for comorbidity. CCI was calculated for all patients at the time of the  
109 CIED implant. The unique complications were defined by a composite of ICD-9 and ICD-10  
110 diagnosis codes, summarized in the **Supplemental Tables 1A-E**. For lead dislodgement, we  
111 used codes for a lead revision within 30 days and confirmed lead dislodgement through manual  
112 chart review. The clinical definitions for post-implant complications for this study are as follows.  
113 Notably, repeat surgical intervention was not a criterion to code the complications, and even  
114 those that were conservatively managed were included.

115 Perforation: Any new pericardial effusion, with or without hemodynamic compromise.

116 Hematomas: Any pocket bleeding that led to interruption of oral anticoagulant therapy,  
117 prolonged hospitalization > 24 hours.

118 Pneumothorax: Any pneumothorax detected on post-procedure chest radiography

119 Lead dislodgement: Included macro-dislodgement as evident on a chest radiograph, and micro-  
120 dislodgement that were detected based on acute rise in capture thresholds.

121 *Statistical analysis*

122 Normally distributed continuous variables and expressed as mean  $\pm$  standard deviation. The  
123 overall frequency of CIED complications was determined using the number of complications

124 divided by the population at risk (device implants) in Olmsted County in the same period. Trends  
125 in complications over time, across age groups, and between genders are estimated using Poisson  
126 regression models. Comparisons between implant groups for categorical factors were completed  
127 using Chi-square tests. Continuous factors were compared between groups using the analysis of  
128 Variance. Overall survival was estimated using the Kaplan-Meier method. These curves were  
129 compared between groups using log-rank tests. P-values less than 0.05 were considered  
130 significant. All analysis was completed using SAS version 9.4.

## 131 **Results:**

### 132 *Population characteristics:*

133 Between 1988 and 2018, there were 2536 CIED initial implants in Olmsted County, including  
134 1927 PPMs (single and dual-chamber), 440 ICDs, and 169 CRT (pacemaker and defibrillator)  
135 devices. The mean age at device implantation was  $73.9 \pm 14.3$  years. Women comprised 42.1%  
136 of all CIED recipients in the study. 197 complications were seen in 175 (6.9%) patients. There  
137 was a significant difference in some baseline characteristics among patients with and without  
138 CIED complications (**Table 1**). Patients with CIED complications were more likely to have  
139 prosthetic valves and less likely to be obese or diabetic. Of the 197 complications, there were 75  
140 (2.9%) lead dislodgements, 53 (2.1%) pocket hematomas, 42 (1.6%) pneumothoraces, and 27  
141 (1.1%) cardiac perforations (**Table 2**). Patients with cardiac perforation were more likely to be  
142 female and less likely to have cardiomyopathy (**Table 3**). There was a higher frequency of  
143 cardiomyopathy, prosthetic valves, and stroke in those patients who suffered pocket hematomas.  
144 Patients with pneumothoraces were older, more likely to be females, and less likely to have  
145 obesity or cardiomyopathy. There was no demographic predisposition to lead dislodgement.

146 *Summary of complications*

147 Of the patients with complications, 97 (3.8% of all implants) were classified as major  
148 complications requiring a procedural intervention as described. The number of complications per  
149 patient was one (133/175), two (18/175), or three (2/175). Over three-quarters of the patients  
150 with complications (135/175) had PPM implants. Sixteen percent of the patients with  
151 complications (28/175) underwent ICD implantation, and the remaining 6.9% (12/175) occurred  
152 in the CRT group. The complication rates in pacemakers, ICD, and CRT were 7%, 6.4%, and  
153 7.1% (p=NS).

154 Of the 27 (1.1%) patients who had perforations, about half required pericardiocentesis  
155 (13/27). Only 5.7% (3/53) of the patients who developed hematomas required pocket re-entry to  
156 resolve the bleeding. The majority (88.7%) of the patients who developed hematomas were on  
157 either anticoagulation or antiplatelet medications or both, with 16.9% (9/53) receiving  
158 periprocedural heparin (all before 2013). More than two-thirds [69.1%, (29/42)] of patients with  
159 pneumothoraces were managed conservatively, and the rest required chest tube placement  
160 temporarily before resolution. Of the 75 patients with lead dislodgement, 35 (46.7%) had atrial  
161 lead dislodgement, 35 (46.7%) had their right ventricular lead dislodged, and 5 (5.3%) had their  
162 coronary sinus lead dislodged. Ninety-two percent of patients (69/75) had to have their dislodged  
163 lead revised.

164 *Temporal trends in CIED complications:*

165 Temporal trends were compared between five intervals: 1988-93, 94-99, 2000-2005, 2006-11,  
166 and 2012-18. There was a significant change in the proportion of complications over time  
167 (**Figure 1**). The total complications increased between 1988-93 to 2000-05; from 2.1% to 10.1%;



168 and subsequently decreased to 7.7% in 2012-2018,  $p=0.001$ . Similar trends were noted for  
169 hematomas,  $p<0.01$ . There were variations in the frequencies of patients with perforations,  
170 pneumothoraces, and lead dislodgement; however, these were not statistically significant.

171 In relation to total implants, the percentage of pacemakers implanted has steadily  
172 declined over the years. The age and sex-adjusted incidence of PPM implantation increased  
173 between 1988-93 and 2000-05; then decreased in 2012-2018. The age and sex-adjusted incidence  
174 of ICD implantation increased between 1988-93 and 2000-05, then decreased in 2012-2018. In  
175 contrast, the age and sex-adjusted incidence of CRT implantation continued to increase  
176 significantly from 2000-05 to 2012-18(Figure 2A)<sup>22</sup>. The complications trends showed an initial  
177 increase in these groups followed by a decline in more recent years, statistically significant  
178 within each group,  $p< 0.05$  (Figure 2B).

#### 179 *Age and sex trends in CIED complications*

180 When stratified by age, the percentage of implants for all periods was the lowest in patients < 50  
181 years, higher in 50-70 years, and highest in patients > 70 years of age,  $p<0.01$  (**Figure 3A**). The  
182 trend of complications in patients >50 years increased from 1988 to 2005 and then trended down  
183 ( $p<0.05$ ). In patients under 50 years of age, the frequency of the complications rose from 1988-  
184 93 to 2000-2005, decreased in 2006-2011, and then increased again in 2012-18, although  
185 statistically not significant (**Figure 3B**).

186 Of the 175 patients with complications, 93 were males (53.1%), and 82 (46.9%) were  
187 females. Males have occupied a steadily growing percentage of the total implants in every time  
188 period. (**Figure 4A**). Within females, the complications increased from 1988-93 to 2000-05 and

189 reached a plateau in recent years. In males, complications went up from 1988-93 to 2000-05 and  
190 then decreased until 2012-2018 ( $p < 0.01$ ) (**Figure 4B**).

#### 191 *Trends in comorbidities and predictors of complications*

192 Using the Charlson comorbidity index (CCI), patients' comorbidities receiving CIED have  
193 increased over time (**Table 4**). However, there was no statistical difference between the CCI of  
194 patients with complications and those who did not within each time frame. When analyzed  
195 separately for each complication subtype, the only significant difference was noted in patients  
196 with hematoma from 2000-2011, who had higher CCI than those without. (**Supplemental**  
197 **Tables 2-5**). When controlled for other factors, utilizing a multivariate regression model, the  
198 presence of prosthetic valves, OR 1.62 (1.11, 2.37),  $p = 0.01$ , was independently associated with  
199 a higher risk of noninfectious complications. Obesity was independently associated with a lower  
200 risk of noninfectious complications, OR 0.68 (0.40, 0.95),  $p = 0.02$ .

#### 201 *Overall survival after CIED implantation*

202 The median follow-up was six years (interquartile range 3.0-10.9 years). Survival after CIED  
203 complication was 63.2% at five years (95% CI 55.9-70.4) and 35.4% (95% CI 27.4-43.4) at ten  
204 years, compared to 61.7% (95% CI 59.8-63.6), and 42.6% (95% CI 40.4-44.8) respectively in  
205 patients without complications ( $p = 0.07$ ) (**Figure 5A**). After PPM, ICD, and CRT implantation  
206 complications, the survival was 35.8% (95% CI 26.7-44.9%), 38.2% (95% CI 18.9-57.5), and  
207 15.6% (95% CI 0.0-43.2%), at ten years, respectively. In the PPM, ICD, and CRT implants  
208 without complications, the ten-year survival was 40.6% (95% CI 38.1-43.1,  $p = 0.25$ ) 53.0%  
209 (95% CI 46.5-58.55%,  $p = 0.10$ ), and 43.5% (95% CI 33.0-54.0%,  $p = 0.67$ ) (**Figure 5BCD**).

210 Females and males with a complication did not significantly differ in survival compared to those  
211 without ( $p=0.21$  and  $0.20$ , respectively). (**Figure 6**)

## 212 **Discussion:**

213 Using a large population-based record-linkage study, we describe trends in the noninfectious  
214 complications of CIED implantation. Our principal findings are (1) Lead dislodgement is the  
215 most common noninfectious complication after CIED implant, followed by hematoma,  
216 pneumothorax, and cardiac perforation. (2) The overall complications showed an up-trend from  
217 1988 to 2005 and have reduced in frequency from 2005 to 2018. (3) The prevalence of  
218 complications is higher in patients over 50 years of age than younger patients. (4) The  
219 comorbidities of patients receiving CIED implants have steadily increased over time. (5) The  
220 presence of prosthetic heart valves was an independent predictor of noninfectious complications  
221 (6) Obesity tends to confer an independent risk-reduction concerning noninfectious CIED  
222 complications. (7) Long-term survival of patients with acute CIED complications was not  
223 different from those without complications but trended towards statistical significance.

### 224 *Incidence of noninfectious complications:*

225 The overall incidence of acute (30-day) noninfectious complications after CIED implants from  
226 1988 to 2018 was estimated to be 6.9%, and that of major complications requiring intervention  
227 was 3.8%. Prior studies have shown wide variability in the percentage of complications (7-18%)  
228 due to heterogeneity in study populations, the definition of complications, data sources, and  
229 follow-up duration.<sup>10,11,19,23-25</sup> Our findings seem to correlate with those reported by prior  
230 population-based studies<sup>23,25</sup>. However, there exists a discrepancy between the results of

231 population-based studies, those obtained from administrative and claims databases<sup>11,26,27</sup>,  
232 National ICD Registry<sup>18,28</sup>, and those from large-scale clinical trials.<sup>10,17</sup>

233 While clinical trials are gold-standard for assessing the effects of an intervention, the  
234 inclusion criteria are often quite strict, rendering a challenge in the generalization of observed  
235 events to the population.<sup>29</sup> Largescale databases, while reflecting the real-world scenario, are  
236 fraught with issues regarding the accuracy of data and lack of detailed follow-up. Therefore, a  
237 population-based medical record linkage system such as the REP serves as an intermediary and  
238 is crucial for mitigating the limitations of alternative data sources. The definitions used in our  
239 study for the complications were more inclusive than prior studies as our goal was to identify  
240 major and minor complications, and their predictors.

241 *Trends in device complications:*

242 Our group has previously described that the incidence of CIED implants in Olmsted County  
243 increased gradually from 1988 to 2005. However, from 2005 to 2018, a decline in CIED  
244 implants has been driven by a reduction in PPM and ICD implants<sup>22</sup>. The overall trend of CIED  
245 complications has been similar, increasing from 1988-93 to 2000-05, followed by a downtrend  
246 until 2012-18. The individual trends of lead dislodgement, hematoma, pneumothorax, and  
247 perforation followed the overall trends with slight variations when they peaked in the mid-2000s.  
248 While no prior studies have encompassed three decades of data, the trends seem to follow the  
249 most extensive reports from each period.<sup>10,17,18,23,25,30</sup> These data appear closely related to the  
250 previously described trends with *infectious* CIED complications<sup>14</sup>. The initial rise in  
251 complications seen from 1988 to 2005 reflects the increase in PPM in an aging population and  
252 expanding ICD indications for sudden death prevention, and the increase in the comorbidity

253 burden<sup>14,22</sup>. Improved implantation techniques, use of micropuncture needles, and imaging-  
254 guided access, with better periprocedural anticoagulation strategies, may have contributed to the  
255 subsequent decline in complications<sup>31–33</sup>.

#### 256 *Predictors of complications*

257 Notably, the mean age of CIED implants at our institution was higher than in most prior  
258 population studies and trials<sup>14</sup>. Furthermore, our patients with 77% coronary artery disease, 75%  
259 valvular disease, 74% heart failure, 71% atrial fibrillation, and 62% diabetes mellitus, among  
260 others, represent a much sicker baseline population than prior studies<sup>18–20,23,34</sup>.

261 The presence of prosthetic heart valves was an independent predictor of noninfectious  
262 complications after adjusting for other implicated factors in device complications. These could  
263 be attributed to longer procedure times due to intricate and complex anatomy and the higher  
264 propensity to be on anticoagulation. The incidence of hematoma was reduced after 2011, likely  
265 reflecting the advantage of uninterrupted oral anticoagulation, a lower risk of pocket bleeding  
266 compared to heparin bridging.<sup>35</sup>

267 Interestingly, obesity was shown to have an independent protective effect against  
268 noninfectious complications. The *reverse epidemiology* or *obesity paradox* is a well-established  
269 entity in chronic disease conditions and has recently been extrapolated to thoracic surgeries and  
270 CIED implants.<sup>36–39</sup> Several mechanisms have been postulated to explain the obesity paradox,  
271 but the most relevant for CIED outcomes appear to be less cardiac cachexia, improved  
272 nutritional status, and better metabolic reserve with lower sarcopenia.<sup>36,39</sup> Obese patients tend to  
273 have a higher prevalence of comorbid conditions such as hypertension, diabetes, and sleep apnea  
274 that require closer periprocedural monitoring and may contribute to improved outcomes. This

275 phenomenon is further evidenced by the extension of the obesity paradox to the critical care  
276 literature.<sup>40</sup> It is important to note that the protective effects of obesity are likely lost at extreme  
277 body mass indices (>40 kg/m<sup>2</sup>), due to an increase in procedural time and complexity, with  
278 increased fluoroscopy duration.<sup>23</sup>

279 *Survival after device implantation and sex considerations:*

280 Data regarding long-term survival after CIED complications are sparse. We describe no  
281 significant difference in the 5-year and 10-year survival in patients without acute noninfectious  
282 CIED complications compared to patients with complications, although trending towards  
283 statistical significance.

284 Prior studies have shown that females are more likely to have short-term CIED  
285 complications.<sup>23,41</sup> While we saw a higher proportion of women in the patients that suffered a  
286 pneumothorax or perforation in our study, female sex was not an independent predictor of  
287 complications when adjusted for age and comorbid conditions. Additionally, females with acute  
288 CIED complications had no difference in long-term survival compared to males.

289 *Limitations:*

290 Despite the benefits of having access to extensive population-based linkage data, our study has  
291 several limitations. Akin to any observational study, we cannot rule out the confounding effect  
292 due to unmeasured variables. Our sample consists predominantly of Caucasians, especially  
293 among the elderly. Prior studies have suggested that the data obtained from the REP could be  
294 generalized to a large percentage of the United States population. This may be inconsistent,  
295 especially when applied to populations with a higher proportion of ethnic minorities. We were  
296 also limited in using ICD codes for CIED implantation, which may have underestimated the

297 actual counts of procedures and comorbid conditions. Yet, the number of CIED implantations is  
298 consistent with previous REP studies with manual verification of all implantations and  
299 complications.

300 Although our data is population-based, most of the CIED-related care during the study  
301 period was provided by a single large tertiary hospital, which may have different practice  
302 patterns than community-based practices. While we understand that initial implants have a  
303 different risk profile than revisions, and generator replacements, we did not have a significant  
304 number of complications in lead revisions or device upgrades to make meaningful comparisons  
305 to de novo implants.

### 306 **Conclusions:**

307 CIED implant complications cause morbidity and may require re-intervention, but not associated  
308 with long term mortality. The frequency of acute noninfectious complications has been gradually  
309 decreasing in recent years, likely owing to safer practices. Prosthetic heart valves appear to be an  
310 independent risk factor for complications, while obesity seems protective, supplementing the  
311 growing obesity paradox literature. Close monitoring of the trends and consistent vigilance  
312 would be needed to maintain the downtrend of CIED complications.

### 313 **Funding Support and Author Disclosures:**

314 This study was made possible using the resources of the Rochester Epidemiology Project,  
315 which is supported by the National Institute on Aging of the National Institutes of Health under  
316 Award Number R01AG034676. The content is solely the responsibility of the authors and does  
317 not necessarily represent the official views of the National Institutes of Health.

318 The study is supported by the Mayo Clinic, Department of Cardiovascular Medicine, and  
319 Medtronic Inc. research funding. Paul A. Friedman is the global principal investigator on the  
320 Medtronic extravascular ICD study, and has served as an advisor, with all funds going to Mayo  
321 Clinic. Siva K. Mulpuru is on the Biotronik SICD advisory board, NIH CICS study section,  
322 received funding from Mayo Clinic Prospective study grant, and a Biosense Webster educational  
323 conference participant. Yong-Mei Cha received research funding from Medtronic Inc. The other  
324 authors have no relevant disclosures.

325

## 326 **References:**

- 327 1. Uslan DZ, Tleyjeh IM, Baddour LM, Friedman PA, Jenkins SM, St Sauver JL, et al.  
328 Temporal trends in permanent pacemaker implantation: A population-based study. *Am*  
329 *Heart J* 2008;155:896–903. doi:10.1016/j.ahj.2007.12.022.
- 330 2. Merriam JA, Rajendra AB, Gold MR. Newer indications for ICD and CRT. *Cardiol Clin*  
331 2014;32:181–190. doi:10.1016/j.ccl.2013.12.004.
- 332 3. Das M. Indications for ICD and cardiac resynchronization therapy for prevention of  
333 sudden cardiac death. *Expert Rev Cardiovasc Ther* 2009;7:181–195.  
334 doi:10.1586/14779072.7.2.181.
- 335 4. Kowlgi GN, Giudicessi JR, Barake W, Bos JM, Ackerman MJ. Efficacy of intentional  
336 permanent atrial pacing in the long-term management of congenital long QT syndrome. *J*  
337 *Cardiovasc Electrophysiol* 2021;32:782–789. doi:10.1111/JCE.14920.
- 338 5. Atreya AR, Cook JR, Lindenauer PK. Complications arising from cardiac implantable



- 339 electrophysiological devices: Review of epidemiology, pathogenesis and prevention for  
340 the clinician. *Postgrad Med* 2016;128:223–230. doi:10.1080/00325481.2016.1151327.
- 341 6. Zhan C, Baine WB, Sedrakyan A, Steiner C. Cardiac device implantation in the United  
342 States from 1997 through 2004: A population-based analysis. *J Gen Intern Med*  
343 2008;23:13–19. doi:10.1007/s11606-007-0392-0.
- 344 7. Cleland JGF, Daubert J-CC, Erdmann E, Freemantle N, Gras D, Kappenberger L, et al.  
345 The effect of cardiac resynchronization on morbidity and mortality in heart failure. *N Engl*  
346 *J Med* 2005;352:1539–1549. doi:10.1056/NEJMoa050496.
- 347 8. Hauser RG, Hayes DL, Kallinen LM, Cannom DS, Epstein AE, Almquist AK, et al.  
348 Clinical experience with pacemaker pulse generators and transvenous leads: An 8-year  
349 prospective multicenter study. *Hear Rhythm* 2007;4:154–160.  
350 doi:10.1016/j.hrthm.2006.10.009.
- 351 9. Udo EO, Zuithoff NPA, Van Hemel NM, De Cock CC, Hendriks T, Doevendans PA, et  
352 al. Incidence and predictors of short- and long-term complications in pacemaker therapy:  
353 The FOLLOWPACE study. *Hear Rhythm* 2012;9:728–735.  
354 doi:10.1016/j.hrthm.2011.12.014.
- 355 10. Ellenbogen KA, Hellkamp AS, Wilkoff BL, Camunãs JL, Love JC, Hadjis TA, et al.  
356 Complications arising after implantation of DDD pacemakers: The MOST experience.  
357 *Am J Cardiol* 2003;92:740–741. doi:10.1016/S0002-9149(03)00844-0.
- 358 11. Koneru JN, Jones PW, Hammill EF, Wold N, Ellenbogen KA. Risk factors and temporal  
359 trends of complications associated with transvenous implantable cardiac defibrillator

- 360 leads. *J Am Heart Assoc* 2018;7. doi:10.1161/JAHA.117.007691.
- 361 12. Landolina M, Gasparini M, Lunati M, Iacopino S, Boriani G, Bonanno C, et al. Long-term  
362 complications related to biventricular defibrillator implantation: Rate of surgical revisions  
363 and impact on survival: Insights from the italian clinicalservice database. *Circulation*  
364 2011;123:2526–2535. doi:10.1161/CIRCULATIONAHA.110.015024.
- 365 13. Kusumoto FM, Schoenfeld MH, Barrett C, Edgerton JR, Ellenbogen KA, Gold MR, et al.  
366 2018 ACC/AHA/HRS Guideline on the Evaluation and Management of Patients With  
367 Bradycardia and Cardiac Conduction Delay: Executive Summary: A Report of the  
368 American College of Cardiology/American Heart Association Task Force on Clinical  
369 Practice Guidelines, and the Heart Rhythm Society. *J Am Coll Cardiol* 2019;74:932–987.  
370 doi:10.1016/j.jacc.2018.10.043.
- 371 14. Dai M, Cai C, Vaibhav V, Sohail MR, Hayes DL, Hodge DO, et al. Trends of  
372 Cardiovascular Implantable Electronic Device Infection in 3 Decades: A Population-  
373 Based Study. *JACC Clin Electrophysiol* 2019;5:1071–1080.  
374 doi:10.1016/j.jacep.2019.06.016.
- 375 15. Tobin K, Stewart J, Westveer D, Frumin H. Acute complications of permanent pacemaker  
376 implantation: Their financial implication and relation to volume and operator experience.  
377 *Am J Cardiol* 2000;85:774–776. doi:10.1016/S0002-9149(99)00861-9.
- 378 16. Al-Khatib SM, Anstrom KJ, Eisenstein EL, Peterson ED, Jollis JG, Mark DB, et al.  
379 Clinical and Economic Implications of the Multicenter Automatic Defibrillator  
380 Implantation Trial-II. *Ann Intern Med* 2005;142:593. doi:10.7326/0003-4819-142-8-  
381 200504190-00007.

- 382 17. Van Eck JWM, Van Hemel NM, Zuithof P, Van Asseldonk JPM, Voskuil TLHM,  
383 Grobbee DE, et al. Incidence and predictors of in-hospital events after first implantation of  
384 pacemakers. *Europace* 2007;9:884–889. doi:10.1093/europace/eum113.
- 385 18. Dewland TA, Pellegrini CN, Wang Y, Marcus GM, Keung E, Varosy PD. Dual-chamber  
386 implantable cardioverter-defibrillator selection is associated with increased complication  
387 rates and mortality among patients enrolled in the NCDR implantable cardioverter-  
388 defibrillator registry. *J Am Coll Cardiol* 2011;58:1007–1013.  
389 doi:10.1016/j.jacc.2011.04.039.
- 390 19. Lee DS, Krahn AD, Healey JS, Birnie D, Crystal E, Dorian P, et al. Evaluation of Early  
391 Complications Related to De Novo Cardioverter Defibrillator Implantation. Insights From  
392 the Ontario ICD Database. *J Am Coll Cardiol* 2010;55:774–782.  
393 doi:10.1016/j.jacc.2009.11.029.
- 394 20. Duray GZ, Schmitt J, Cicek-Hartvig S, Hohnloser SH, Israel CW. Complications leading  
395 to surgical revision in implantable cardioverter defibrillator patients: Comparison of  
396 patients with single-chamber, dual-chamber, and biventricular devices. *Europace*  
397 2009;11:297–302. doi:10.1093/europace/eun322.
- 398 21. Boggan JC, Baker AW, Lewis SS, Dicks K V., Durkin MJ, Moehring RW, et al. An  
399 Automated Surveillance Strategy to Identify Infectious Complications After Cardiac  
400 Implantable Electronic Device Procedures. *Open Forum Infect Dis* 2015;2:1–8.  
401 doi:10.1093/ofid/ofv128.
- 402 22. Vaidya VR, Asirvatham R, Kowlgi GN, Dai M-Y, Cochuyt JJ, Hodge DO, et al. Trends in  
403 Cardiovascular Implantable Electronic Device Insertion Between 1988 and 2018 in

- 404 Olmsted County. *JACC Clin Electrophysiol* 2021. doi:10.1016/j.jacep.2021.06.006.
- 405 23. Kirkfeldt RE, Johansen JB, Nohr EA, Jorgensen OD, Nielsen JC. Complications after  
406 cardiac implantable electronic device implantations: An analysis of a complete,  
407 nationwide cohort in Denmark. *Eur Heart J* 2014;35:1186–1194.  
408 doi:10.1093/eurheartj/eh511.
- 409 24. Chugh SS, Havmoeller R, Narayanan K, Singh D, Rienstra M, Benjamin EJ, et al.  
410 Worldwide epidemiology of atrial fibrillation: A global burden of disease 2010 study.  
411 *Circulation* 2014;129:837–847. doi:10.1161/CIRCULATIONAHA.113.005119.
- 412 25. Ranasinghe I, Labrosciano C, Horton D, Ganesan A, Curtis JP, Krumholz HM, et al.  
413 Institutional variation in quality of cardiovascular implantable electronic device  
414 implantation. *Ann Intern Med* 2019;171:309–317. doi:10.7326/M18-  
415 2810/SUPPL\_FILE/M18-2810\_SUPPLEMENT.PDF.
- 416 26. Lin YS, Hung SP, Chen PR, Yang CH, Wo HT, Chang PC, et al. Risk Factors Influencing  
417 Complications of Cardiac Implantable Electronic Device Implantation: Infection,  
418 Pneumothorax and Heart Perforation: A Nationwide Population-Based Cohort Study.  
419 *Medicine (Baltimore)* 2014;93. doi:10.1097/MD.0000000000000213.
- 420 27. Cantillon DJ, Exner D V., Badie N, Davis K, Gu NY, Nabutovsky Y, et al. Complications  
421 and Health Care Costs Associated With Transvenous Cardiac Pacemakers in a Nationwide  
422 Assessment. *JACC Clin Electrophysiol* 2017;3:1296–1305.  
423 doi:10.1016/J.JACEP.2017.05.007.
- 424 28. Al-Khatib SM, Hellkamp A, Bardy GH, Hammill S, Hall WJ, Mark DB, et al. Survival of

- 425 Patients Receiving a Primary Prevention Implantable Cardioverter-Defibrillator in Clinical  
426 Practice vs Clinical Trials. *JAMA* 2013;309:55–62. doi:10.1001/JAMA.2012.157182.
- 427 29. Milan D, Singh JP. Device implantation and complications: time to recalibrate our  
428 expectations? *Eur Heart J* 2014;35:1167–1168. doi:10.1093/EURHEARTJ/EHT568.
- 429 30. Parsonnet V, Bernstein AD, Lindsay B. Pacemaker-implantation complication rates: An  
430 analysis of some contributing factors. *J Am Coll Cardiol* 1989;13:917–921.  
431 doi:10.1016/0735-1097(89)90236-2.
- 432 31. Nicholson D, Flisak M, Abudayyeh I, Dihy J, Patel P. Complications Associated with  
433 Venipuncture During Cardiac Device Implantation are Significantly Reduced with  
434 Utilization of Micropuncture Needle. *Circ Arrhythmia Electrophysiol* 2011;124.  
435 doi:10.1161/CIRCEP.115.002921.
- 436 32. Ramza BCM, Rosenthal L, Hui R, Nsah E, Savader S, Lawrence JH, et al. Safety and  
437 Effectiveness of Placement of Pacemaker and Defibrillator Leads in the Axillary Vein  
438 Guided by Contrast Venography. *Am J Cardiol* 1997;80:892–896. doi:10.1016/S0002-  
439 9149(97)00542-0.
- 440 33. Birnie DH, Healey JS, Wells GA, Verma A, Tang AS, Krahn AD, et al. Pacemaker or  
441 Defibrillator Surgery without Interruption of Anticoagulation. *N Engl J Med*  
442 2013;368:2084–2093.  
443 doi:10.1056/NEJMOA1302946/SUPPL\_FILE/NEJMOA1302946\_DISCLOSURES.PDF.
- 444 34. da Silva KR, Albertini CM de M, Crevelari ES, de Carvalho EIJ, Fiorelli AI, Filho MM, et  
445 al. Complications after Surgical Procedures in Patients with Cardiac Implantable

- 446 Electronic Devices: Results of a Prospective Registry. *Arq Bras Cardiol* 2016;107:245.  
447 doi:10.5935/ABC.20160129.
- 448 35. Li HK, Chen FC, Rea RF, Asirvatham SJ, Powell BD, Friedman PA, et al. No increased  
449 bleeding events with continuation of oral anticoagulation therapy for patients undergoing  
450 cardiac device procedure. *Pacing Clin Electrophysiol* 2011;34:868–874.  
451 doi:10.1111/J.1540-8159.2011.03049.X.
- 452 36. Jahangir A, Mirza M, Shahreyar M, Mengesha T, Shearer R, Sultan S, et al. Presence of  
453 obesity is associated with lower mortality in elderly patients with implantable cardioverter  
454 defibrillator. *Int J Obes* 2018 422 2017;42:169–174. doi:10.1038/ijo.2017.211.
- 455 37. Il'Giovine ZJ, Patel D, Kumar A, Trulock K, Ann Moennich L, Donnellan E, et al.  
456 Obesity predicts survival after cardiac resynchronization therapy independent of effect on  
457 left ventricular ejection fraction. *Circ Hear Fail* 2020.  
458 doi:10.1161/CIRCHEARTFAILURE.120.007424.
- 459 38. Tulinský L, Mitták M, Tomášková H, Ostruszka P, Penka I, Ihnát P. Obesity paradox in  
460 patients undergoing lung lobectomy - Myth or reality? *BMC Surg* 2018;18:1–6.  
461 doi:10.1186/S12893-018-0395-2/FIGURES/1.
- 462 39. Kowlgi GN, Siontis KC. Safety of catheter ablation in obese patients: Less complicated  
463 than you think. *J Cardiovasc Electrophysiol* 2022;33:664–666. doi:10.1111/JCE.15394.
- 464 40. Hutagalung R, Marques J, Kobylka K, Zeidan M, Kabisch B, Brunkhorst F, et al. The  
465 obesity paradox in surgical intensive care unit patients. *Intensive Care Med*  
466 2011;37:1793–1799. doi:10.1007/S00134-011-2321-2.

- 467 41. Peterson PN, Daugherty SL, Wang Y, Vidaillet HJ, Heidenreich PA, Curtis JP, et al.  
468 Gender differences in procedure-related adverse events in patients receiving implantable  
469 cardioverter-defibrillator therapy. *Circulation* 2009;119:1078–1084.  
470 doi:10.1161/CIRCULATIONAHA.108.793463.

471

472 **Figure legends:**

473 Figure 1: Central illustration. Trends of overall CIED complications from 1988-2018. Trendlines are provided for perforations, hematomas,  
474 pneumothoraces, lead dislodgements, and the mean Charlson Comorbidity Indices. CIED = cardiovascular implantable electronic device.  
475 MADIT(Multicenter Automatic Defibrillator Implantation Trial); MOST (Multi-arm Optimization of Stroke Thrombolysis); DAVID (Dual Chamber  
476 and VVI Implantable Defibrillator); DEFINITE (Defibrillators in Nonischemic Cardiomyopathy Treatment Evaluation); CRT (Cardiac  
477 Resynchronization Therapy); ARISTOTLE (Apixaban for Reduction in Stroke and Other Thromboembolic Events in Atrial Fibrillation), ROCKET-AF  
478 (Rivaroxaban Once Daily Oral Direct Factor Xa Inhibition Compared With Vitamin K Antagonism for Prevention of Stroke and Embolism Trial in  
479 Atrial Fibrillation); DANISH (Danish Study to Assess the Efficacy of ICDs in Patients With Non-Ischemic Systolic Heart Failure on Mortality

480 Figure 2: The trends of CIED complications by device type. (A) Percentage of CIED implants in the year-group by device type (B) Frequency of  
481 complications within device type. CIED = cardiovascular implantable electronic device; CRT = cardiac resynchronization therapy; ICD =  
482 implantable cardioverter-defibrillator; PPM = permanent pacemaker.

483 Figure 3: The trends of CIED complications by age. (A) Percentage of CIED implants in the year-group by age-groups (B) Frequency of  
484 complications within age groups. Abbreviations as in Figure 2.

485 Figure 4: The trends of CIED complications by sex. (A) Percentage of CIED implants in the year-group by sex (B) Frequency of complications within  
486 sex groups. Abbreviations as in Figure 2.

487 Figure 5: Survival Curves in (A) Total population, (B) PPM, (C) ICD, (D) CRT, based on the presence of complications or not. Abbreviations as in  
488 Figure 2.

489 Figure 6: Survival curves by sex and complications. F = Female; M = Male.

490

491

492

493

494



495 Table 1: Baseline demographics for all patients.

| <b>All Complications</b>   |                       |                                  |                              |                |
|----------------------------|-----------------------|----------------------------------|------------------------------|----------------|
|                            | <b>Total (N=2536)</b> | <b>No Complications (N=2361)</b> | <b>Complications (N=175)</b> | <b>P value</b> |
| <b>Female sex</b>          | 1068 (42.1%)          | 986 (41.8%)                      | 82 (46.9%)                   | 0.19           |
| <b>Mean Age (y)</b>        | 73.9 ± 14.3           | 73.8 ± 14.3                      | 74.8 ± 14.0                  | 0.39           |
| <b>Atrial fibrillation</b> | 1790 (70.6%)          | 1665 (70.5%)                     | 125 (71.4%)                  | 0.80           |
| <b>CAD</b>                 | 1947 (76.8%)          | 1815 (76.9%)                     | 132 (75.4%)                  | 0.66           |
| <b>Cardiomyopathy</b>      | 1166 (46.0%)          | 1086 (46.0%)                     | 80 (45.7%)                   | 0.94           |
| <b>Heart Failure</b>       | 1858 (73.3%)          | 1728 (73.2%)                     | 130 (74.3%)                  | 0.75           |
| <b>CKD</b>                 | 1287 (50.7%)          | 1207(51.1%)                      | 80(45.7%)                    | 0.17           |
| <b>COPD</b>                | 950 (37.5%)           | 882 (37.4%)                      | 68 (38.9%)                   | 0.69           |
| <b>Diabetes</b>            | 1580 (62.3%)          | 1487 (63.0%)                     | 93 (53.1%)                   | <b>0.01</b>    |

|                               |              |              |             |              |
|-------------------------------|--------------|--------------|-------------|--------------|
| <b>Heart transplant</b>       | 40 (1.6%)    | 38 (1.6%)    | 2 (1.1%)    | 0.63         |
| <b>Hypertension</b>           | 2206 (87.0%) | 2048 (86.7%) | 158 (90.3%) | 0.18         |
| <b>Pulmonary hypertension</b> | 850 (33.5%)  | 783 (33.2%)  | 67 (38.3%)  | 0.17         |
| <b>Malignancy</b>             | 1317 (51.9%) | 1223 (51.8%) | 94 (53.7%)  | 0.62         |
| <b>Obesity</b>                | 1392 (54.9%) | 1314 (55.7%) | 78 (44.6%)  | <b>0.005</b> |
| <b>TIA/Stroke</b>             | 843 (33.2%)  | 774 (32.8%)  | 69 (39.4%)  | 0.07         |
| <b>Valvular Disease</b>       | 1906 (75.2%) | 1766 (74.8%) | 140 (80.0%) | 0.12         |
| <b>Prosthetic Valve</b>       | 436 (17.2%)  | 393 (16.7%)  | 43 (24.6%)  | <b>0.007</b> |
| <b>Implant type</b>           |              |              |             | 0.89         |
| <b>CRT</b>                    | 169 (6.7%)   | 157 (6.7%)   | 12 (6.9%)   |              |
| <b>ICD</b>                    | 440 (17.4%)  | 412 (17.5%)  | 28 (16.0%)  |              |
| <b>Pacemaker</b>              | 1927 (76.0%) | 1791 (75.9%) | 135 (77.1%) |              |

497 Table 2: Baseline demographics by type of complication.

|                            | Perforation     |                |              | Hematoma        |             |              | Pneumothorax    |             |             | Lead Dislodgement |             |            |
|----------------------------|-----------------|----------------|--------------|-----------------|-------------|--------------|-----------------|-------------|-------------|-------------------|-------------|------------|
|                            | No<br>(N=2509)  | Yes (N=27)     | P<br>value   | No<br>(N=2483)  | Yes (N=53)  | P<br>value   | No<br>(N=2494)  | Yes (N=42)  | P<br>value  | No<br>(N=2459)    | Yes (N=75)  | P<br>value |
| <b>Female sex</b>          | 1050<br>(41.9%) | 18 (66.7%)     | <b>0.009</b> | 1049<br>(42.3%) | 19 (35.9%)  | 0.35         | 1044<br>(41.7%) | 24 (57.1%)  | <b>0.05</b> | 1033<br>(42.0%)   | 35 (46.7%)  | 0.42       |
| <b>Mean Age (y)</b>        | 73.9 ±<br>14.3  | 76.4 ±<br>12.2 | 0.34         | 73.9 ± 14.3     | 74.8 ± 15.0 | 0.62         | 73.8 ±<br>14.3  | 78.3 ± 11.5 | <b>0.04</b> | 73.9 ±<br>14.3    | 73.3 ± 13.9 | 0.72       |
| <b>Atrial fibrillation</b> | 1768<br>(70.5%) | 22 (81.5%)     | 0.21         | 1752<br>(70.6%) | 38 (71.7%)  | 0.86         | 1762<br>(70.7%) | 28 (66.7%)  | 0.57        | 1734<br>(70.5%)   | 56 (74.7%)  | 0.43       |
| <b>CAD</b>                 | 1927<br>(76.8%) | 20 (74.1%)     | 0.74         | 1905<br>(76.7%) | 42 (79.3%)  | 0.67         | 1916<br>(76.8%) | 31 (73.8%)  | 0.65        | 1893<br>(76.9%)   | 54 (72.0%)  | 0.32       |
| <b>Cardiomyopathy</b>      | 1160<br>(46.3%) | 6 (22.2%)      | <b>0.01</b>  | 1132<br>(45.6%) | 34 (64.2%)  | <b>0.007</b> | 1153<br>(46.2%) | 13 (31.0%)  | <b>0.05</b> | 1129<br>(45.9%)   | 37 (49.3%)  | 0.55       |
| <b>Heart Failure</b>       | 1841<br>(73.4%) | 17 (63.0%)     | 0.22         | 1814<br>(73.1%) | 44 (83.0%)  | 0.10         | 1825<br>(73.2%) | 33 (78.6%)  | 0.43        | 1804<br>(73.3%)   | 54 (72.0%)  | 0.80       |
| <b>CKD</b>                 | 1276            | 11 (40.7%)     | 0.30         | 1259            | 28 (52.8%)  | 0.76         | 1268            | 19 (45.2%)  | 0.47        | 1254              | 33 (44.0%)  | 0.24       |

|                               | (50.9%)         |             |      | (50.7%)         |            |                  | (50.8%)         |            |             | (51.0%)         |            |      |
|-------------------------------|-----------------|-------------|------|-----------------|------------|------------------|-----------------|------------|-------------|-----------------|------------|------|
| <b>COPD</b>                   | 941<br>(37.5%)  | 9 (33.3%)   | 0.66 | 924 (37.2%)     | 26 (49.1%) | 0.08             | 934 (37.5%)     | 16 (38.1%) | 0.93        | 924 (37.6%)     | 26 (35.7%) | 0.61 |
| <b>Diabetes</b>               | 1564<br>(62.3%) | 16 (59.3%)  | 0.74 | 1549<br>(62.4%) | 31 (58.5%) | 0.56             | 1560<br>(62.6%) | 20 (47.6)  | <b>0.05</b> | 1540<br>(62.6%) | 40 (53.3%) | 0.10 |
| <b>Heart transplant</b>       | 40 (1.6%)       | 0 (0.0%)    | 0.51 | 39 (1.6%)       | 1 (1.9%)   | 0.86             | 40 (1.6%)       | 0 (0.0%)   | 0.41        | 39 (1.6%)       | 1 (1.3%)   | 0.86 |
| <b>Hypertension</b>           | 2179<br>(86.9%) | 27 (100.0%) | 0.04 | 2160<br>(87.0%) | 46 (86.8%) | 0.97             | 2167<br>(86.9%) | 39 (92.9%) | 0.25        | 2139<br>(86.9%) | 67 (89.3%) | 0.54 |
| <b>Pulmonary hypertension</b> | 840<br>(33.5%)  | 10 (37.0%)  | 0.70 | 828 (33.4%)     | 22 (41.5%) | 0.21             | 833 (33.4%)     | 17 (40.5%) | 0.34        | 825 (33.5%)     | 25 (33.3%) | 0.97 |
| <b>Malignancy</b>             | 1304<br>(52.0%) | 13 (48.2%)  | 0.69 | 1285<br>(51.8%) | 32 (60.4%) | 0.21             | 1290<br>(51.7%) | 27 (64.3%) | 0.11        | 1281<br>(52.1%) | 36 (48.0%) | 0.49 |
| <b>Obesity</b>                | 1378<br>(54.9%) | 14 (51.8%)  | 0.75 | 1369<br>(55.1%) | 23 (43.4%) | 0.09             | 1377<br>(55.2%) | 15 (35.7%) | <b>0.01</b> | 1354<br>(55.0%) | 38 (50.7%) | 0.46 |
| <b>TIA/Stroke</b>             | 833(33.2%)      | 10(37.0)    | 0.67 | 813(32.7%)      | 30(56.6%)  | <b>&lt;0.001</b> | 830 (33.3%)     | 13 (31.0%) | 0.75        | 818 (33.2%)     | 25 (33.3%) | 0.99 |
| <b>Valvular Disease</b>       | 1883<br>(75.1%) | 23 (85.2%)  | 0.23 | 1861<br>(74.9%) | 45 (84.9%) | 0.1              | 1874<br>(75.1%) | 32 (76.2%) | 0.88        | 1847<br>(75.1%) | 59 (78.7%) | 0.48 |

|                         |                 |            |      |                 |            |              |                 |            |      |                 |            |      |
|-------------------------|-----------------|------------|------|-----------------|------------|--------------|-----------------|------------|------|-----------------|------------|------|
| <b>Prosthetic Valve</b> | 432<br>(17.2%)  | 4 (14.8%)  | 0.74 | 419 (16.9%)     | 17 (32.1%) | <b>0.004</b> | 431 (17.3%)     | 5 (11.9%)  | 0.36 | 418 (17.0%)     | 18 (24.0%) | 0.11 |
| <b>Implant type</b>     |                 |            | 0.04 |                 |            | 0.38         |                 |            | 0.64 |                 |            | 0.71 |
| <b>CRT</b>              | 168 (6.7%)      | 1 (3.7%)   |      | 164 (6.6%)      | 5 (9.4%)   |              | 166 (6.7%)      | 3 (7.1%)   |      | 165 (6.7%)      | 4 (5.3%)   |      |
| <b>ICD</b>              | 440<br>(17.5%)  | 0 (0.0%)   |      | 428 (17.2%)     | 12 (22.6%) |              | 435 (17.4%)     | 5 (11.9%)  |      | 429 (17.4%)     | 11 (14.7%) |      |
| <b>Pacemaker</b>        | 1901<br>(75.8%) | 26 (96.3%) |      | 1891<br>(76.2%) | 36 (67.9%) |              | 1892<br>(75.9%) | 34 (81.0%) |      | 1867<br>(75.9%) | 60 (80.0%) |      |

498

499

500

501

502

503

504

505

506 Table 3: Distribution of complications:

---

**Complications****Number (% of total implants)**

Lead dislodgement

75 (2.9%)

Hematoma

53 (2.1%)

Pneumothorax

42 (1.6%)

Perforation

27 (1.1%)

---

507

508

509

510

511

512 Table 4: Charlson comorbidity index trends

| Year Group       | Complications | Patients analyzed | Overall Mean Charlson Comorbidity Index * | Mean Charlson Comorbidity Index | P-value † |
|------------------|---------------|-------------------|-------------------------------------------|---------------------------------|-----------|
| <b>1988-1993</b> | No            | 225               | 1.1 ± 1.3                                 | 1.1 ± 1.3                       | 0.20      |
|                  | Yes           | 4                 |                                           | 0.3 ± 0.5                       |           |
| <b>1994-1999</b> | No            | 338               | 1.5 ± 1.5                                 | 1.5 ± 1.6                       | 0.95      |
|                  | Yes           | 20                |                                           | 1.6 ± 1.1                       |           |
| <b>2000-2005</b> | No            | 525               | 2.0 ± 1.8                                 | 2.0 ± 1.8                       | 0.51      |
|                  | Yes           | 53                |                                           | 2.2 ± 1.8                       |           |
| <b>2006-2011</b> | No            | 470               | 2.1 ± 1.8                                 | 2.1 ± 1.8                       | 0.45      |
|                  | Yes           | 42                |                                           | 1.9 ± 2.1                       |           |
| <b>2012-2018</b> | No            | 729               | 2.3 ± 1.9                                 | 2.3 ± 1.9                       | 0.90      |
|                  | Yes           | 47                |                                           | 2.3 ± 2.0                       |           |

\* The p-value for the Charlson Comorbidity Index trend across all periods was significant at < 0.01

† The p-values described in this column are comparing patients with and without complication for each time period

513

514 Table 5: Multivariate regression model for predictors of complications

| Variable            | Odds Ratio (95% Confidence Interval) | P-value     |
|---------------------|--------------------------------------|-------------|
| Male sex            | 0.82 (0.60, 1.14)                    | 0.24        |
| Age at event        | 1.01 (0.99, 1.02)                    | 0.44        |
| Atrial fibrillation | 0.99 (0.68, 1.44)                    | 0.94        |
| Diabetes            | 0.73 (0.53, 1.02)                    | 0.06        |
| COPD                | 1.11 (0.80, 1.55)                    | 0.52        |
| CKD                 | 0.80 (0.57, 1.12)                    | 0.20        |
| Valvular Disease    | 1.40 (0.91, 2.13)                    | 0.12        |
| Prosthetic Valves   | 1.62 (1.11, 2.37)                    | <b>0.01</b> |
| Obesity             | 0.68 (0.40, 0.95)                    | <b>0.02</b> |
| PPM implant         | 0.91 (0.48, 1.70)                    | 0.76        |
| ICD implant         | 0.93 (0.46, 1.90)                    | 0.85        |

Abbreviations – COPD: Chronic Obstructive Pulmonary Disease; CKD: Chronic Kidney Disease; PPM: Permanent Pacemaker; ICD: Implantable Cardioverter-Defibrillator

515 Figure 1: Central illustration. Trends of overall CIED complications from 1988-2018. Trendlines are provided for perforations, hematomas,  
516 pneumothoraces, lead dislodgements, and the mean Charlson Comorbidity Indices. CIED = cardiovascular implantable electronic device.



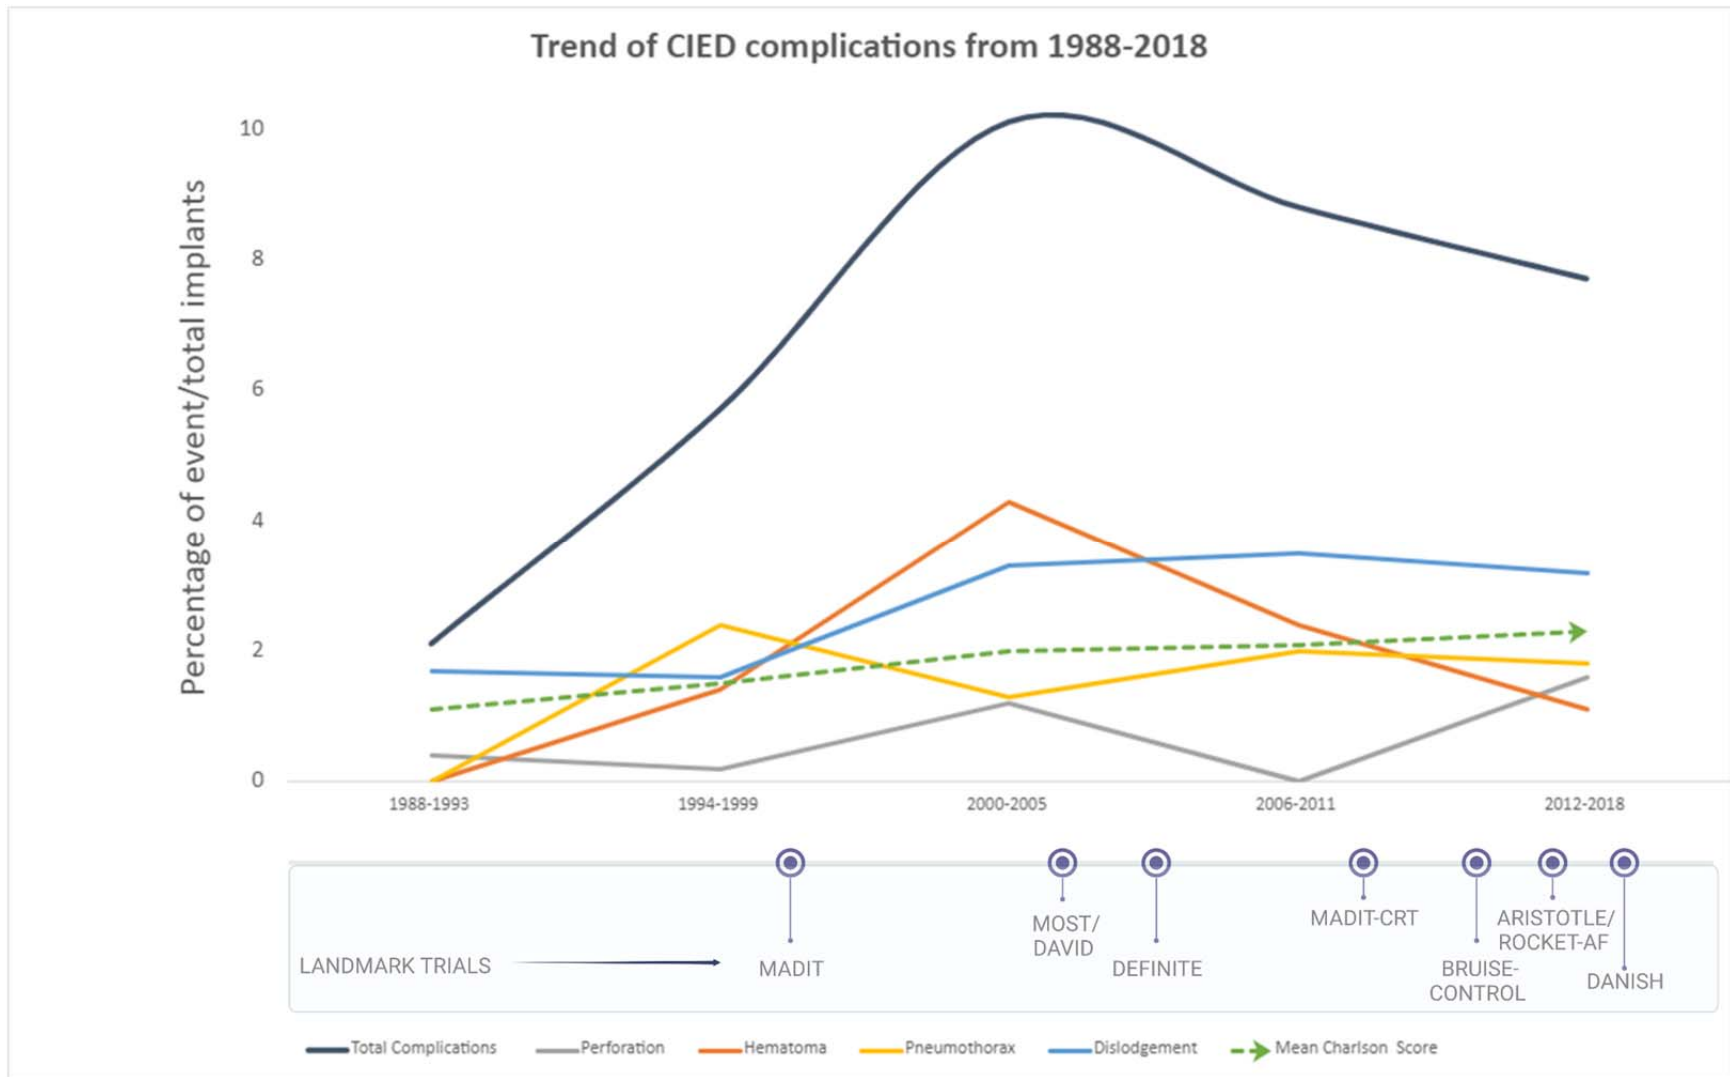

517

518 Figure 2: The trends of CIED complications by device type. (A) Percentage of CIED implants in the year-group by device type (B) Frequency of  
 519 complications within device type. CIED = cardiovascular implantable electronic device; CRT = cardiac resynchronization therapy; ICD =  
 520 implantable cardioverter-defibrillator; PPM = permanent pacemaker.

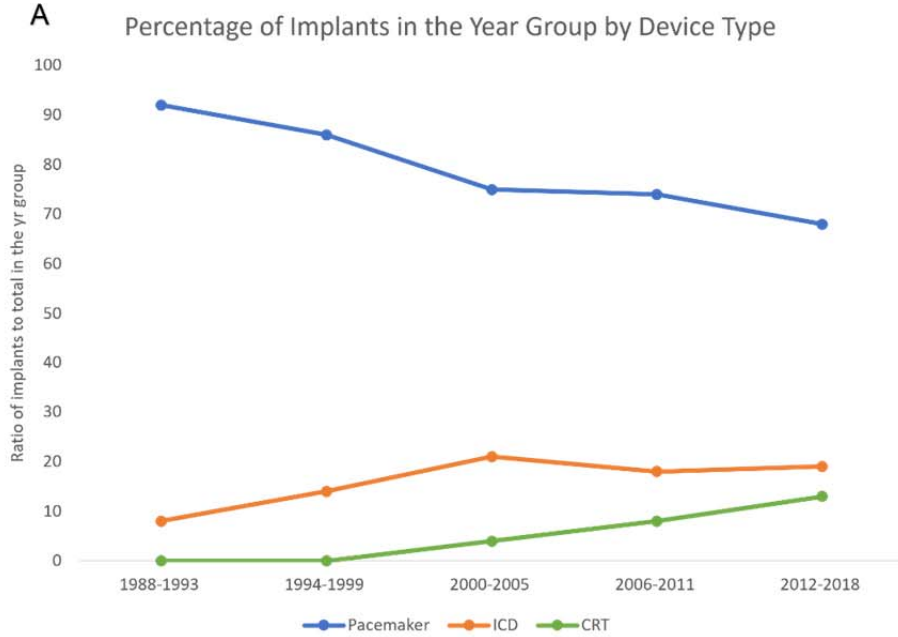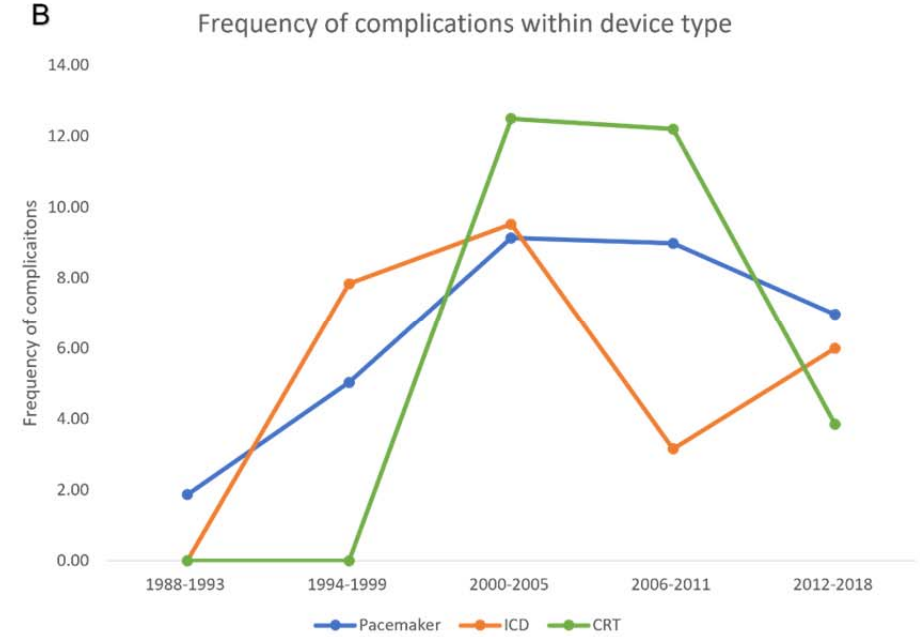

521  
522  
523  
524  
525  
526  
527

528 Figure 3: The trends of CIED complications by age. (A) Percentage of CIED implants in the year-group by age-groups (B) Frequency of  
529 complications within age groups. Abbreviations as in Figure 2.

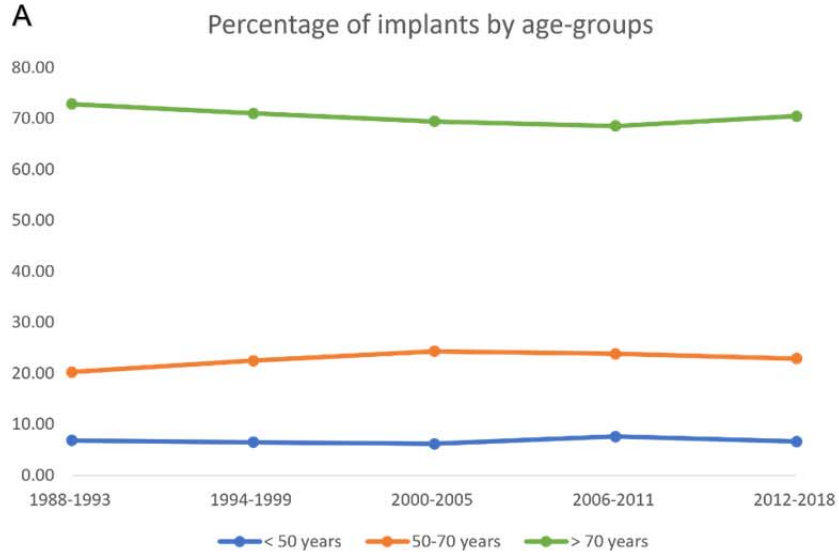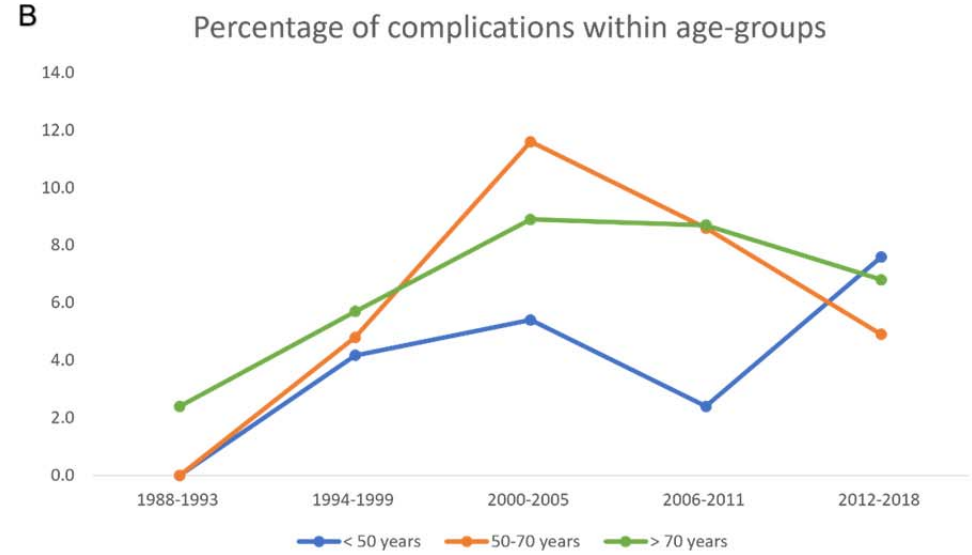

530

531

532

533

534

535

536

537

538 Figure 4: The trends of CIED complications by sex. (A) Percentage of CIED implants in the year-group by sex (B) Frequency of complications within  
539 sex groups. Abbreviations as in Figure 2.

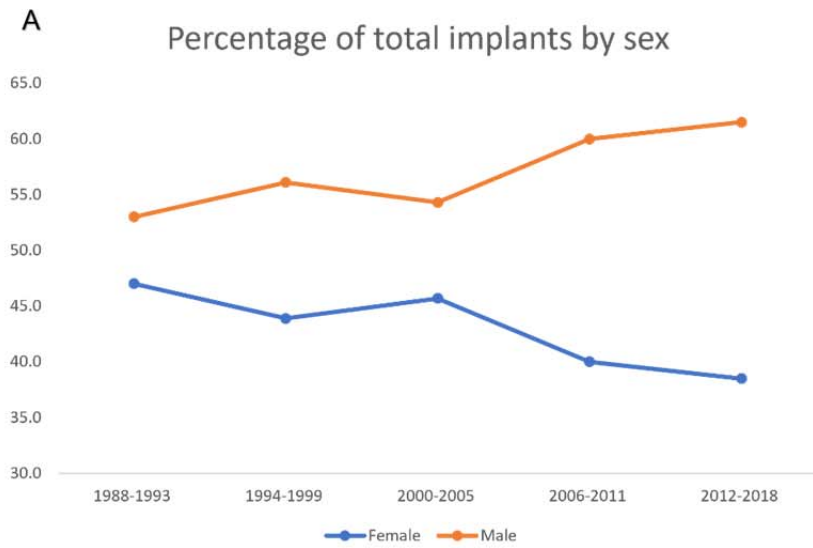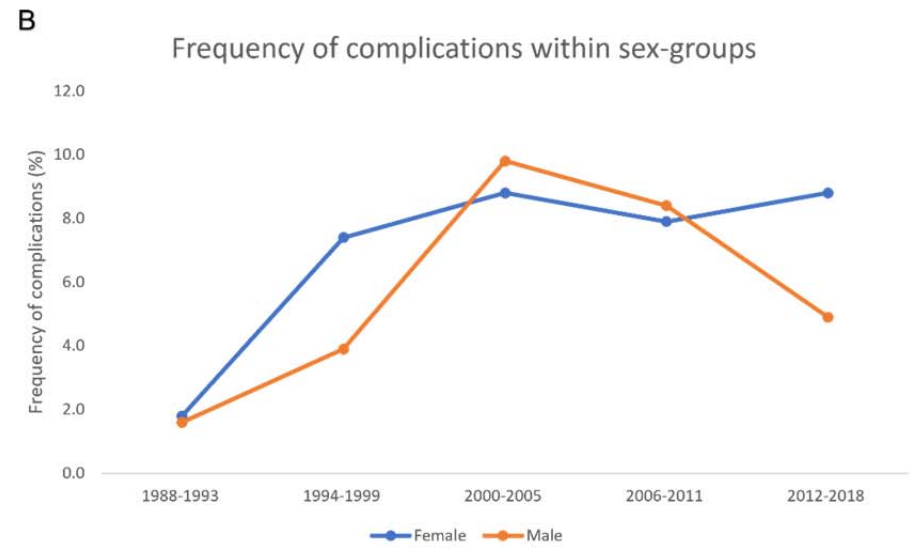

540

541

542

543

544

545

546

547

548 Figure 5: Survival Curves in (A) Total population, (B) PPM, (C) ICD, (D) CRT, based on the presence of complications or not. Abbreviations as in  
 549 Figure 2.

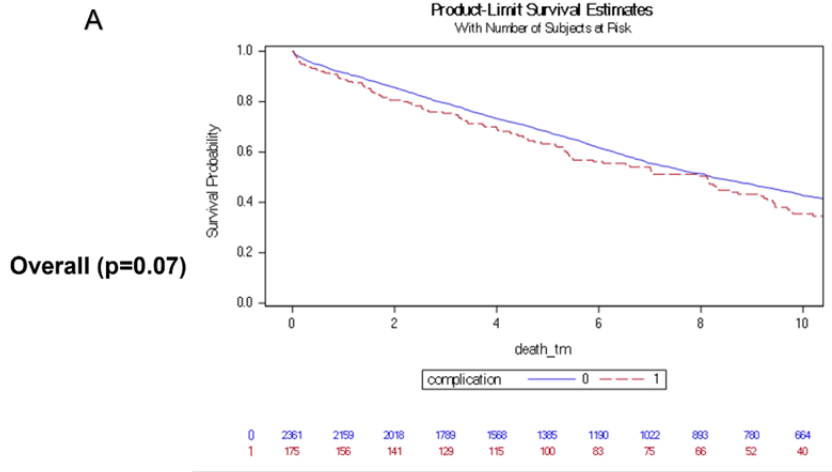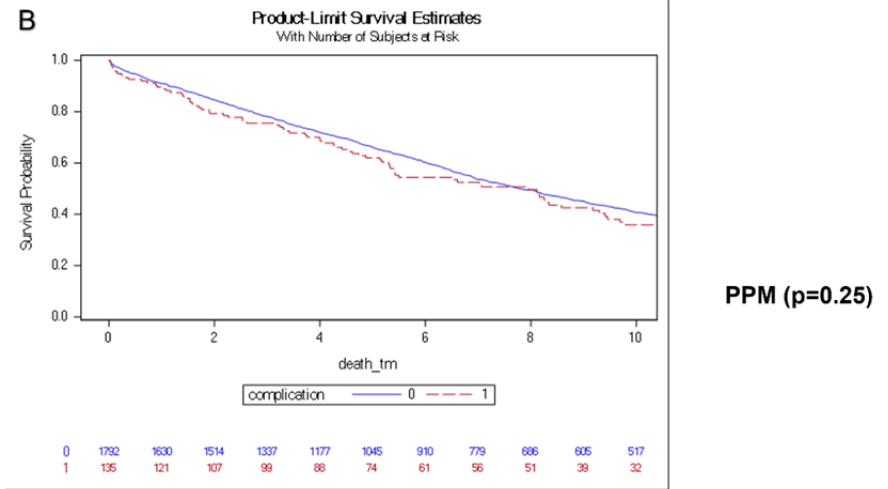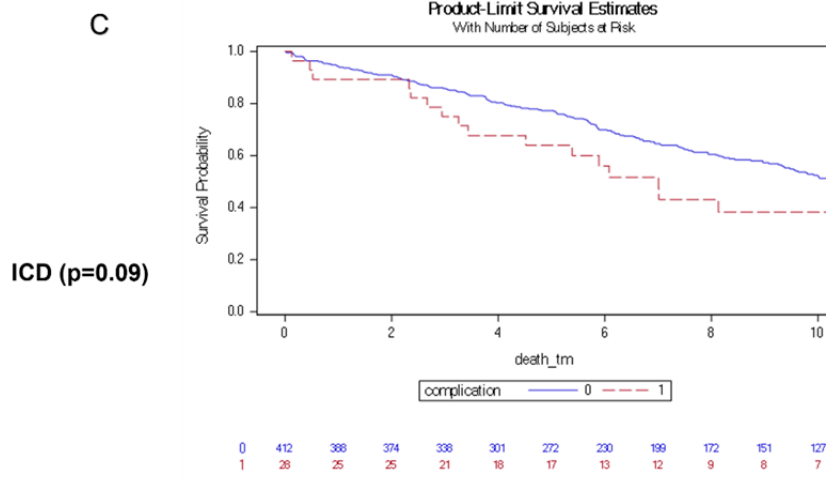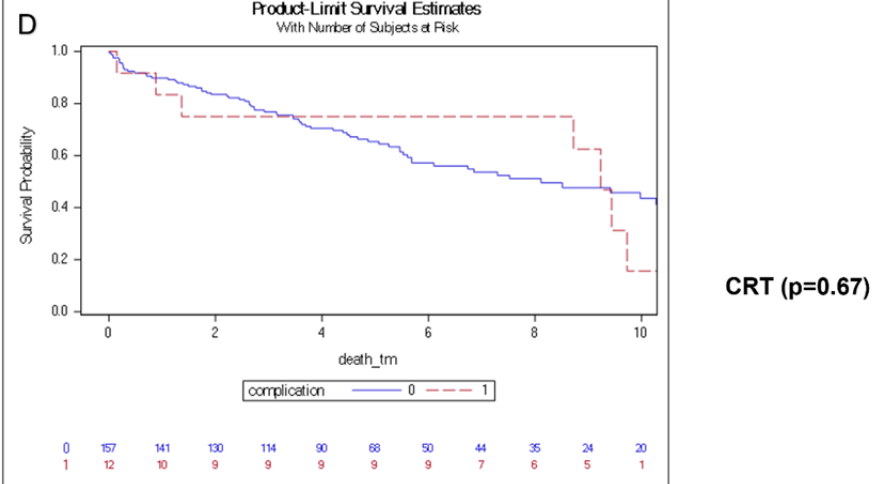

550

551

552 Figure 6: Survival curves by sex and complications. F = Female; M = Male.

Product-Limit Survival Estimates  
With Number of Subjects at Risk

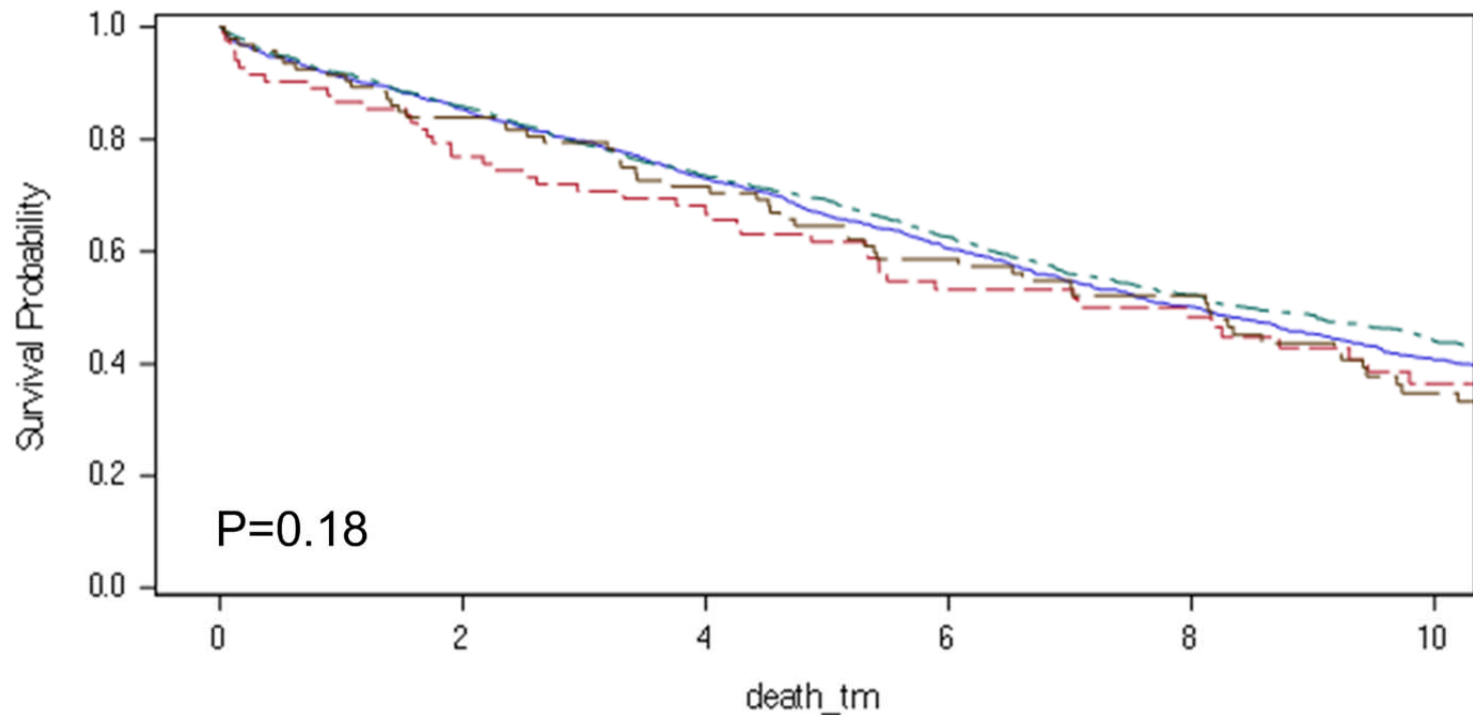

|                                  |                                  |
|----------------------------------|----------------------------------|
| — 1: gender=F complication=0     | - - - 2: gender=F complication=1 |
| - - - 3: gender=M complication=0 | — 4: gender=M complication=1     |

|   |      |      |      |      |     |     |     |     |     |     |     |
|---|------|------|------|------|-----|-----|-----|-----|-----|-----|-----|
| 1 | 986  | 886  | 839  | 746  | 657 | 572 | 496 | 432 | 373 | 330 | 280 |
| 2 | 82   | 71   | 63   | 58   | 52  | 45  | 36  | 33  | 29  | 22  | 17  |
| 3 | 1375 | 1261 | 1179 | 1043 | 911 | 813 | 694 | 590 | 520 | 450 | 384 |
| 4 | 93   | 85   | 78   | 71   | 63  | 55  | 47  | 42  | 37  | 30  | 23  |

553

554
